# Supplementary material for: Chronic inflammation and apoptosis propagate in ischemic cerebellum and heart of non-human primates
Source: PubMed Central journal article supplement (PMC5732692; doi:10.18632/oncotarget.18330), 2017-06-01
Supplement: oncotarget-08-102820-s001.pdf [file oncotarget-08-102820-s001.pdf]

## Chronic inflammation and apoptosis propagate in ischemic cerebellum and heart of non-human primates

### SUPPLEMENTARY MATERIALS

| Neurological observations                                               | Sham control | TGI |
|-------------------------------------------------------------------------|--------------|-----|
| Partial paralysis and rigidity                                          | No           | Yes |
| Intermittent episodes of convulsions                                    | No           | Yes |
| Partial absence of motion on both arms and hindlimbs                    | No           | Yes |
| Partial absence of reflex on upper extremities                          | No           | Yes |
| Difficulty to right itself even after assistance                        | No           | Yes |
| Mild pneumothorax                                                       | No           | Yes |
| Partial inability to use digits and absence of grasping                 | No           | Yes |
| Histological Observations                                               | Sham control | TGI |
| CA1 Cell loss*                                                          | No           | Yes |
| Increase TUNEL+ cells in hippocampus*                                   | No           | Yes |
| Elevated eosinophilic cell bodies in CA1 region*                        | No           | Yes |
| GFAP+ cell infiltration in hippocampus*                                 | No           | Yes |
| Purkinje cell loss <sup>#</sup>                                         | No           | Yes |
| Increase of GFAP+ cells in cerebellum <sup>#</sup>                      | No           | Yes |
| Upregulation of CD68+ (Macrophage) in cerebellum and heart <sup>#</sup> | No           | Yes |
| Upregulation of HLA-DR+ cells in cerebellum and heart <sup>#</sup>      | No           | Yes |
| Overexpression of TNF- $\alpha$ in cerebellum and heart <sup>#</sup>    | No           | Yes |
| Overexpression of caspase 3+ cells in heart <sup>#</sup>                | No           | Yes |
| Upregulation of TUNEL + cells in cerebellum <sup>#</sup>                | No           | Yes |

Legend: \*Hara et al., 2007; #Present study
